# Supplementary material for: Engineering an oxygen-vacancy-mediated step-scheme charge carrier dynamic coupling WO3−X/ZnFe2O4 heterojunction for robust photo-Fenton-driven levofloxacin detoxification
Source: Royal Society of Chemistry journal article supplement (doi:10.1039/d2nj00067a), 2022-01-01
Supplement: d2nj00067a1.pdf [file d2nj00067a1.pdf]

**Engineering Oxygen vacancy mediated Step-scheme charge carrier dynamic coupling  $\text{WO}_{3-x}/\text{ZnFe}_2\text{O}_4$  heterojunction towards robust photo-Fenton driven Levofloxacin detoxification**

**Kundan Kumar Das<sup>1</sup>, Sriram Mansingh<sup>1</sup>, Dipti Prava Sahoo<sup>1</sup>, Ritik Mohanty<sup>1</sup> and  
Kulamani Parida<sup>1\*</sup>**

<sup>1</sup>Centre for Nanoscience and Nanotechnology, SOA (Deemed to be University),  
Bhubaneswar-751030, Odisha (India)

\*Corresponding author

E-mail: [paridakulamani@yahoo.com](mailto:paridakulamani@yahoo.com) & [kulamaniparida@soa.ac.in](mailto:kulamaniparida@soa.ac.in)

Tel. No. +91-674-2379425, Fax. +91-6 74-2581637

---

### **Synthesis of ZnFe<sub>2</sub>O<sub>4</sub> (ZnF)**

A combination of hydrothermal and calcination techniques were being employed to fabricate ZnF nanoparticles. At first, calculated amount of zinc nitrate and iron nitrate were dissolved in distilled water under vigorous magnetic stirring to form a homogeneous solution at room temperature. Then after, aqueous solution KOH was added to the homogenised solution in order to maintain the pH=13 of the solution. The resulting solution was transferred into a 100 mL Teflon-lined autoclave and the container was closed and maintained at 190 °C for 8 h. The container was cooled to room temperature after the completion of reaction. The as-obtained product was washed with distilled water and ethanol and finally dried in an oven at 80 °C. Then the solid material was heated at 550 °C for 5 h in a muffle furnace and brown-coloured ZnF nanoparticles were obtained.<sup>1</sup>

### **Synthesis of WO<sub>3-x</sub>**

Tungsten trioxide was prepared as per literature with small modification. Initially, some amount of Na<sub>2</sub>WO<sub>4</sub>·2H<sub>2</sub>O was dispersed in distilled water under vigorous magnetic stirring to obtain a homogeneous solution. Soon after complete dissolution, 4.8 M of HNO<sub>3</sub> was added to the homogenised tungsten solution and the mixture was left stirring for 36 h at room temperature. After the reaction, the tungsten trioxide was collected by filtration and washed continuously to neutral pH and dried for 12 h. The collected solid powder was finally calcined at 500 °C for 5 h to obtain desired material WO<sub>3-x</sub>.<sup>2</sup>

### Synthesis of WO<sub>3-x</sub>/ZnF (WZF)

WO<sub>3-x</sub>/ZnF heterojunction was prepared as follows: initially different amounts of as prepared WO<sub>3-x</sub> were dispersed in 40 mL ethanol which was followed by the addition of 0.5 g of fumaric acid and subjected to stirring for 2 h. To the above suspension, 1 g of ZnF nanoparticles was added and stirred for 12 h at 60 °C. The obtained powders were collected by centrifugation, dried and then heat-treated at 550 °C for 4 h to remove organics. The prepared composites are named according to the weight percentage of WO<sub>3-x</sub> taken during the time of preparation i.e. 10WZF (10wt% WO<sub>3-x</sub>), 15WZF (15wt% WO<sub>3-x</sub>) and 20WZF (20wt% WO<sub>3-x</sub>).

| Sl. No | Instrument                                            | Description                                                                                                                            | Model                                            |
|--------|-------------------------------------------------------|----------------------------------------------------------------------------------------------------------------------------------------|--------------------------------------------------|
| 1      | X-Ray Diffraction (XRD)                               | CuK $\alpha$ radiation source ( $\lambda=0.154\text{nm}$ ), scanning window $2\theta =5^{\circ}\text{-}70^{\circ}$ and 40 KV and 40 mA | Rigaku-Ultima IV                                 |
| 2      | UV-Visible (UV-Vis) diffuse reflectance spectra (DRS) | Deuterium UV lamp and Xe visible light, BaSO <sub>4</sub> as standard                                                                  | JASCO V-750                                      |
| 3      | Fourier Transform Infrared spectrometer (FTIR)        | KBr pellet as reference                                                                                                                | JASCO FTIR-4600                                  |
| 4      | Photoluminescence Spectrofluorometer (PL)             | Deuterium UV lamp and Xe visible light                                                                                                 | JASCO FP-8300 spectrofluorometer                 |
| 5      | Raman spectrometer                                    | 332nm laser                                                                                                                            | RENISHAW InVia Raman spectrometer                |
| 6      | Electrochemical analyser                              | Three electrode-based system, Pt counter, Ag/AgCl reference and sample coated FTO as working. 0.1M NaSO <sub>4</sub> electrolyte.      | IVIUMnSTAT Multichannel electrochemical analyser |
| 7      | Transmission electron microscopy (TEM)                | Acceleration voltage-200 kV                                                                                                            | TEM, JEOL-2100                                   |

### Photo-Fenton Levofloxacin (LVX) degradation

Levofloxacin was selected as a typical pollutant for photocatalytic application. At first 0.015 g of catalyst along with 20 mL of Levofloxacin (LVX) solution was taken in a conical flask and allowed to stir for 15 min under dark conditions to establish adsorption-desorption equilibrium prior to exposure of sunlight for 30 min. Certain amount of  $H_2O_2$  was added to the reaction medium before irradiation with sunlight. The suspension was centrifuged and the concentration of LVX present in solution was analysed by using JASCO V-750 UV-Vis spectrophotometer in between the wavelength of 200-400 nm.

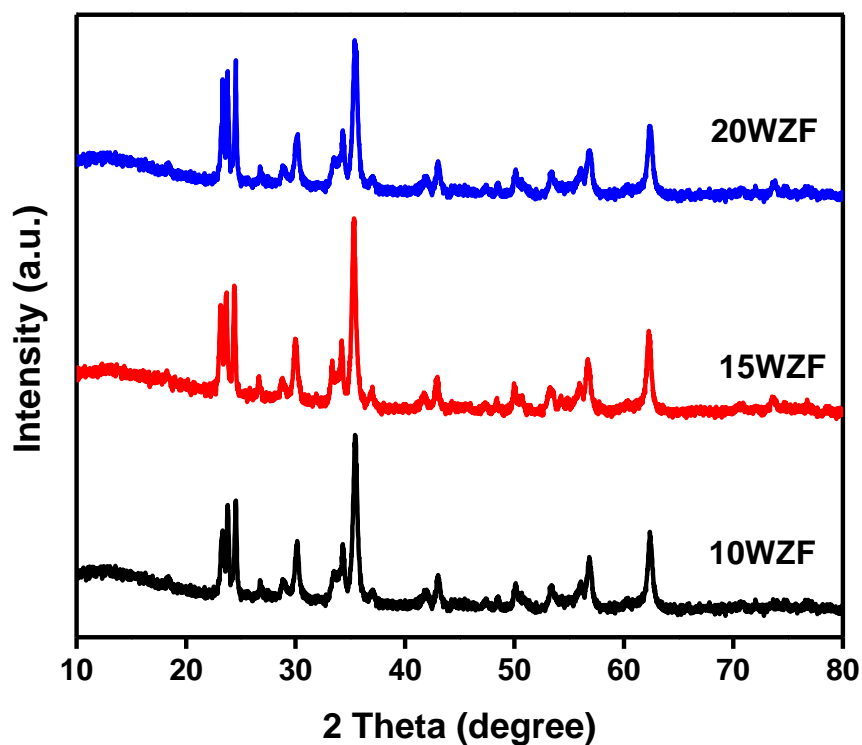

**Figure S1.** XRD patterns of 10WZF, 15WZF and 20WZF composite materials

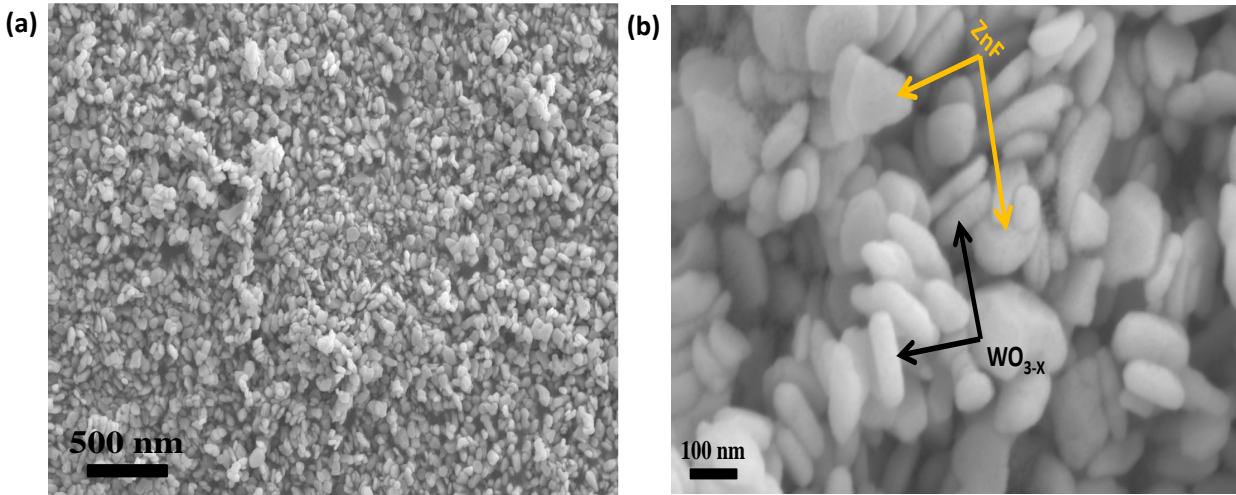

**Figure S2.** (a) low and (b) enlarged SEM images of 15WZF

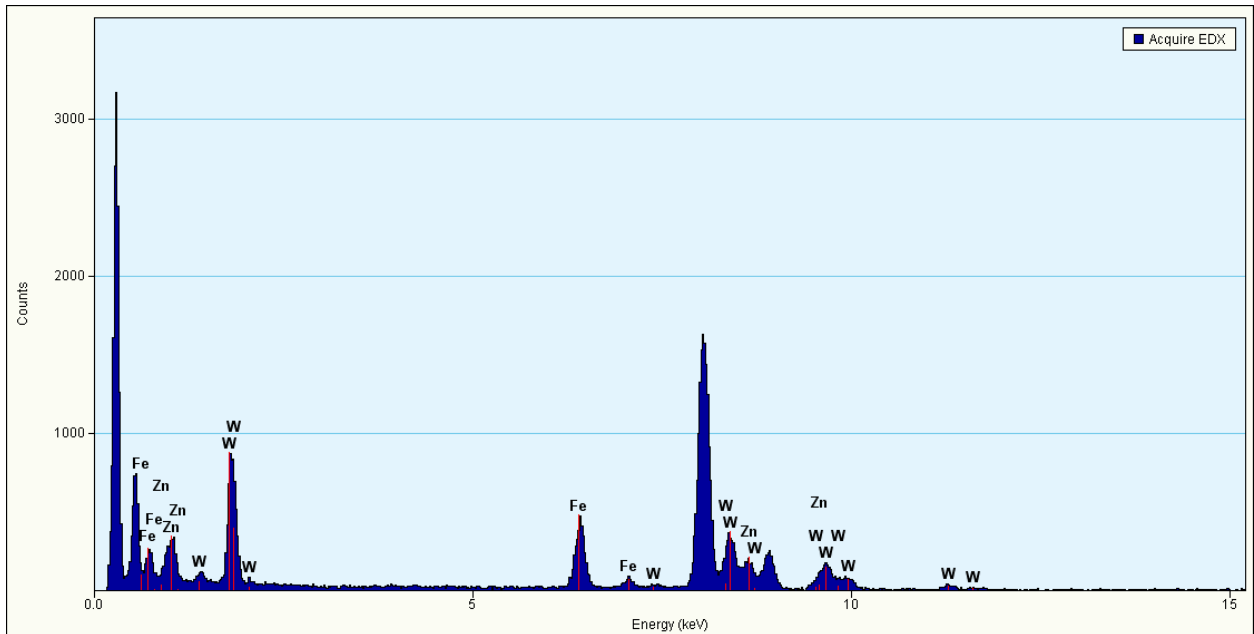

**Figure S3** EDAX spectrum of 15WZF

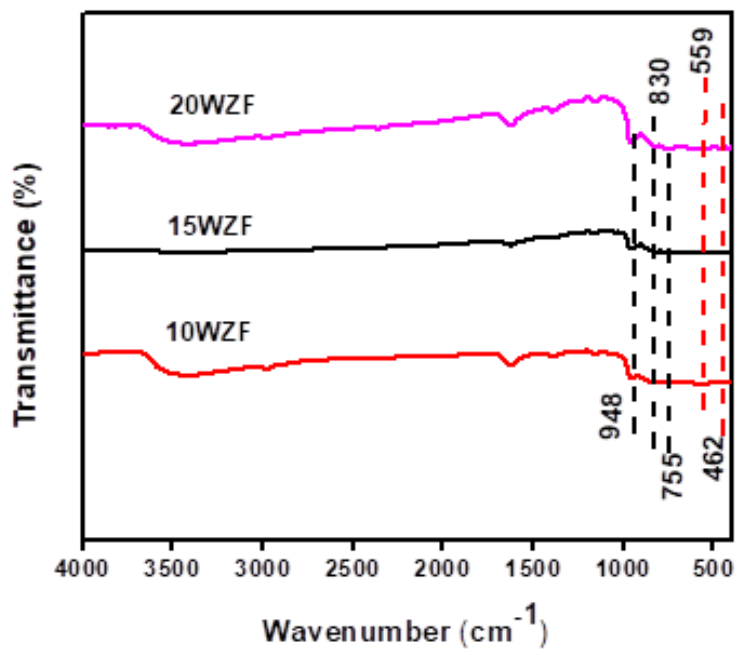

**Figure S4.** FTIR spectra of 10WZF, 15WZF and 20WZF composites

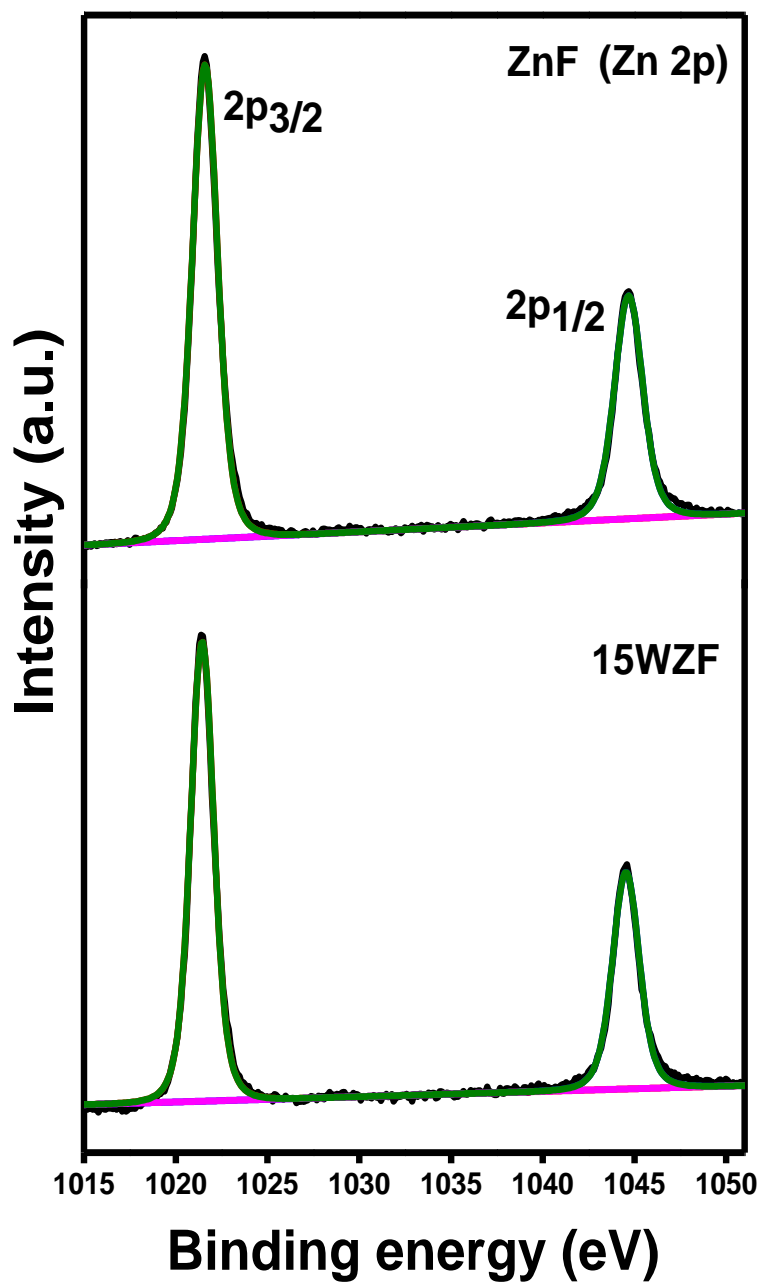

**Figure S5.** XPS peak of Zn 2p of ZnF and 15WZF

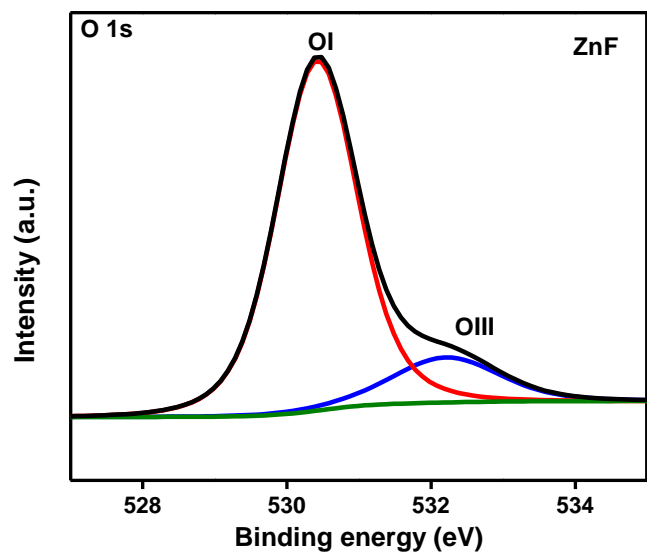

**Figure S6.** XPS peak of O 1s of ZnF

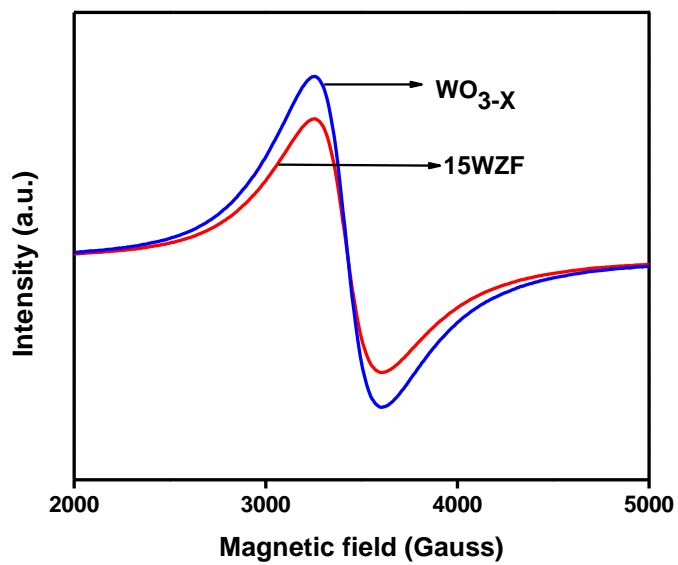

**Figure S7** EPR patterns of  $\text{WO}_{3-x}$ , and 15WZF



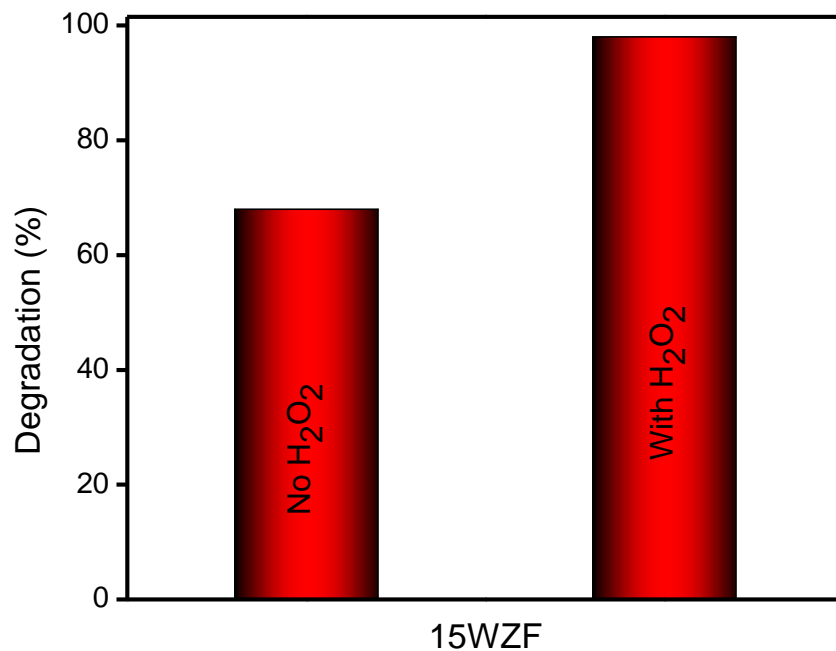

**Figure S8.** Levofloxacin degradation over 15WZF photocatalyst in absence and presence of H<sub>2</sub>O<sub>2</sub>

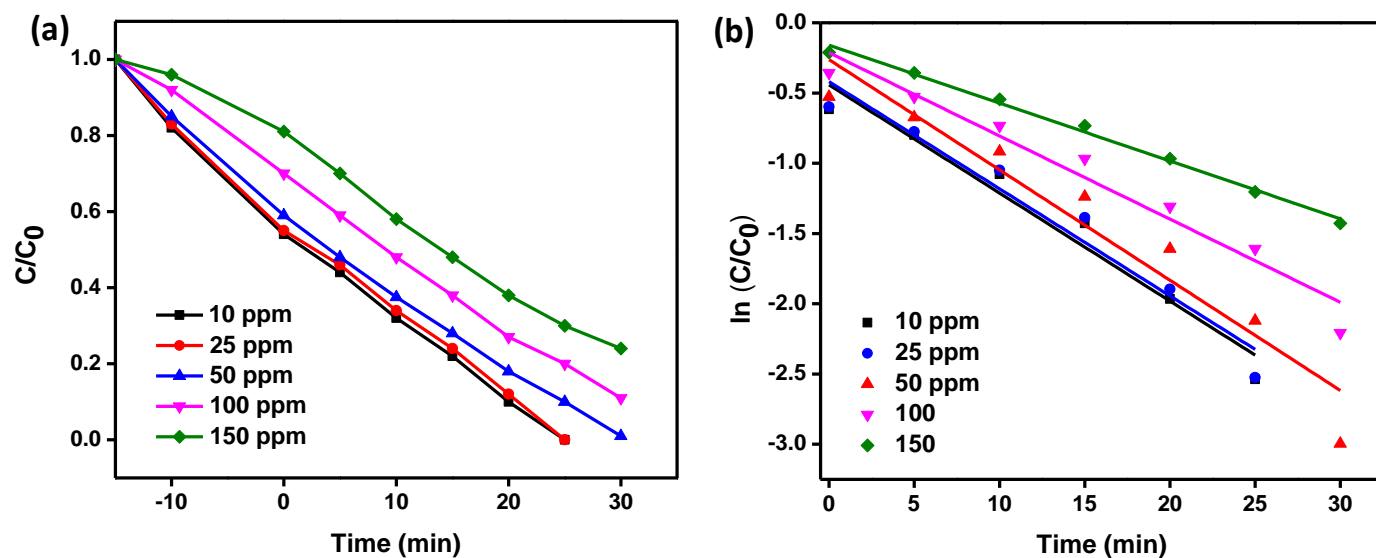

**Figure S9.** Effect of operation parameters on LVX degradation by 15WZF photocatalyst (a) LVX concentration (b) kinetics

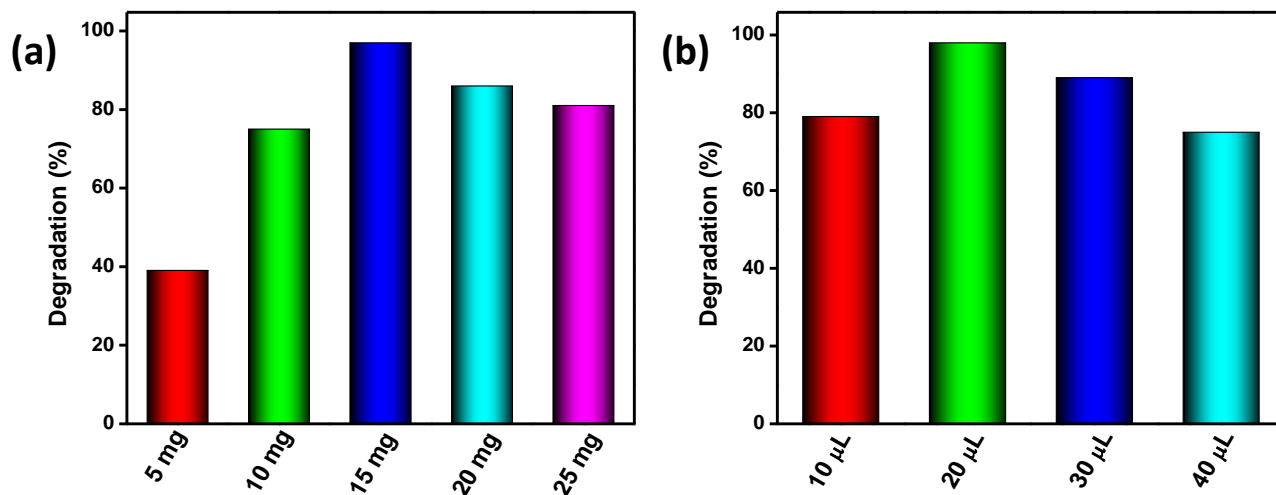

**Figure S10.** Effect of operation parameters on LVX degradation by 15WZF photocatalyst (a) catalyst dose and (b) H<sub>2</sub>O<sub>2</sub> concentration

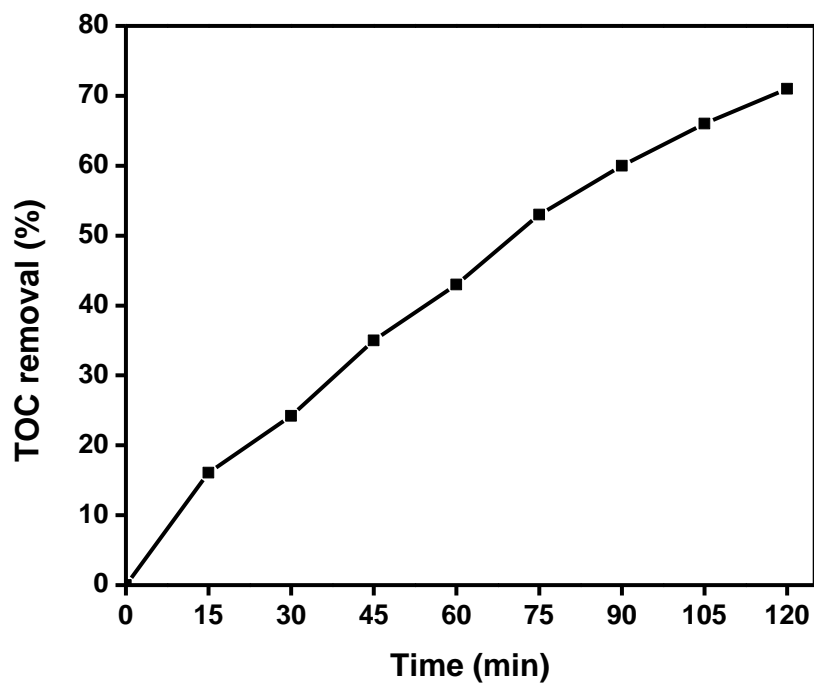

**Figure S11.** TOC removal percentage of LVX over 15WZF

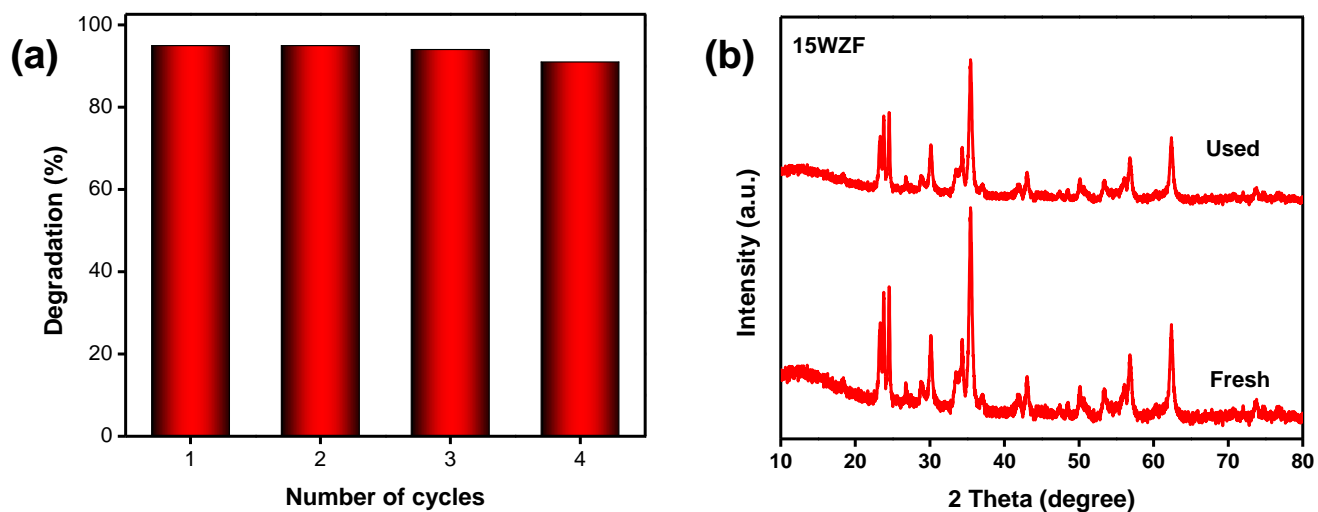

**Figure S12.** (a) Recyclability test toward LVX degradation over 15WZF and (b) post-XRD characterization of 15WZF

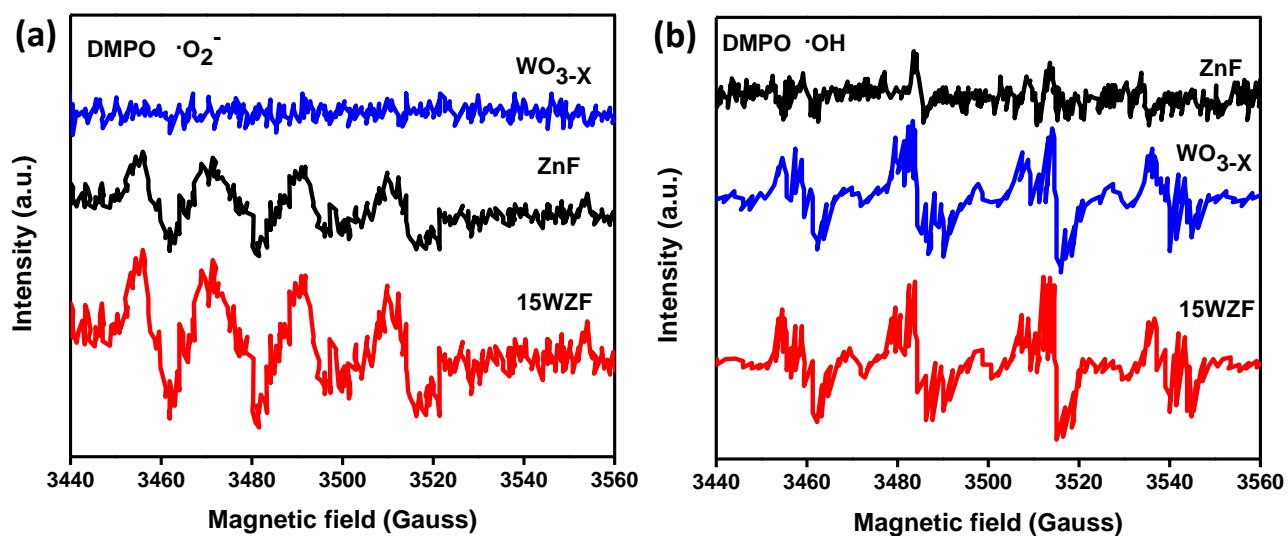

**Figure S13.** EPR spectra of (a) DMPO- $\cdot\text{O}_2^-$  in methanol and (b) DMPO- $\cdot\text{OH}$  in aqueous dispersion in presence of WO<sub>3-x</sub>, ZnF and 15WZF

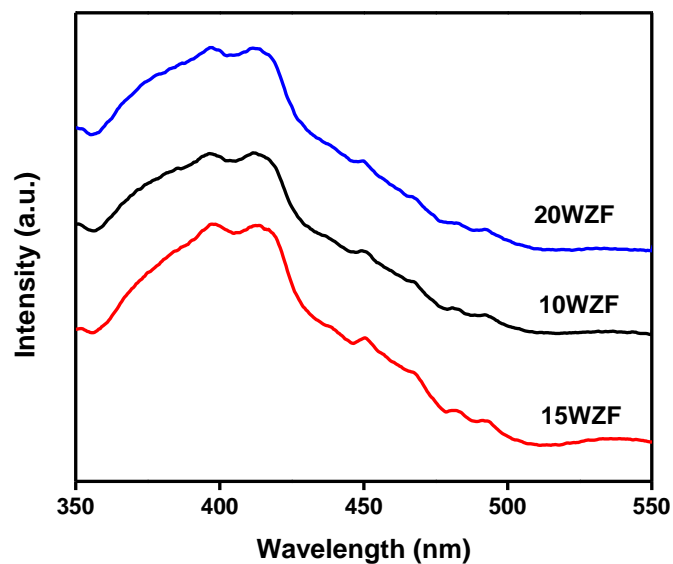

**Figure S14.** PL spectra of 10WZF, 15WZF and 20WZF specimens

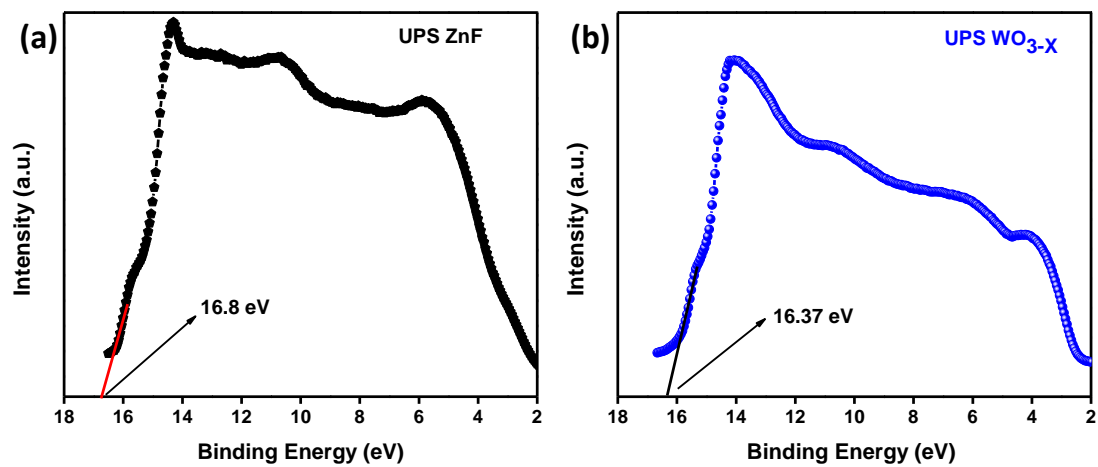

**Figure S15.** Ultraviolet photoemission spectroscopy (UPS) spectra of ZnF and  $\text{WO}_{3-x}$

**Table S1:** Degradation efficiency,  $R^2$ ,  $K_{app}$  and  $t_{1/2}$  values of all synthesized samples towards LVX photo-Fenton degradation

| Photocatalyst     | Degradation Efficiency (%) | ( $R^2$ ) | ( $k_{app}$ ) ( $10^{-4}\text{min}^{-1}$ ) | $t_{1/2}$ (min) |
|-------------------|----------------------------|-----------|--------------------------------------------|-----------------|
| Blank             | 3                          | 0.98      | 29                                         | 0.023           |
| WO <sub>3-x</sub> | 42                         | 0.97      | 141                                        | 0.0049          |
| ZnF               | 61                         | 0.96      | 256                                        | 0.0027          |
| 10WZF             | 92                         | 0.98      | 618                                        | 0.0011          |
| 15WZF             | 99                         | 0.95      | 898                                        | 0.0007          |
| 20WZF             | 87                         | 0.98      | 487                                        | 0.0014          |

**Table S2** A comparative table showing the rate of LVX degradation by various photocatalytic systems as compared to 15WZF photocatalyst

| Photocatalyst                                                                                | Light source                           | Levofloxacin concentration | Catalyst dosage | Time    | Degradation Efficiency (%) | Ref |
|----------------------------------------------------------------------------------------------|----------------------------------------|----------------------------|-----------------|---------|----------------------------|-----|
| 30 wt% MoS <sub>2</sub><br>/Ag <sub>2</sub> Mo <sub>2</sub> O <sub>7</sub>                   | 150 W Xe lamp                          | 5 ppm                      | 100 mg          | 90 min  | 97                         | 3   |
| ZnFe <sub>2</sub> O <sub>4</sub> /NCDs/Ag <sub>2</sub> CO <sub>3</sub>                       | 300 W Xe lamp<br>( $\lambda > 420$ nm) | 10 ppm                     | 30 mg           | 90 min  | 88.75                      | 4   |
| Ag <sub>2</sub> CO <sub>3</sub> /CeO <sub>2</sub> /AgBr                                      | 300 W Xe lamp                          | 10 ppm                     | 25 mg           | 40 min  | 87.3                       | 5   |
| Bi <sub>2</sub> WO <sub>6</sub> nanocuboids                                                  | Visible light                          | 10 ppm                     | 0.75g           | 150 min | 80                         | 6   |
| SrTiO <sub>3</sub> /(Ag/Fe <sub>3</sub> O <sub>4</sub> )<br>/g-C <sub>3</sub> N <sub>4</sub> | 500 W Xe lamp<br>( $\lambda > 420$ nm) | 10 ppm                     | 30 mg           | 90 min  | 99.3                       | 7   |
| 3% Ta <sub>3</sub> N <sub>5</sub> /TiO <sub>2</sub>                                          | 250 W Xe lamp                          | 10 ppm                     | 50 mg           | 120 min | 92.79                      | 8   |
| 10% Ag/AgCl@ZIF-8                                                                            | 150 W Xe lamp                          | 10 ppm                     | 50 mg           | 60 min  | 87.3                       | 9   |

|                                                                                                  |                                        |        |       |         |      |              |
|--------------------------------------------------------------------------------------------------|----------------------------------------|--------|-------|---------|------|--------------|
| /g-C <sub>3</sub> N <sub>4</sub>                                                                 | ( $\lambda > 420$ nm)                  |        |       |         |      |              |
| MoS <sub>2</sub> /C                                                                              | 30 mW Xe lamp<br>( $\lambda > 420$ nm) | 10 ppm | 10 mg | 180 min | 86.9 | 10           |
| 500-MnO@MnO <sub>x</sub>                                                                         | 500 W Xe lamp                          | 30 ppm | 5 mg  | 30 min  | 98.1 | 11           |
| (BiOBr) <sub>0.75</sub> -<br>(Bi <sub>7</sub> O <sub>9</sub> I <sub>3</sub> ) <sub>0.25</sub> -U | 400 W halogen<br>bulb                  | 50 ppm | 0.2g  | 120 min | 95.4 | 12           |
| 15% WO <sub>3-x</sub> /ZnFe <sub>2</sub> O <sub>4</sub>                                          | Sunlight                               | 50 ppm | 15 mg | 30 min  | 99   | This<br>work |

## References

1. S.B. Rawal, H.J. Kang, D.I. Won and W.I. Lee, *Appl. Catal. B: Environ.*, 2019, **256**, 117856.
2. J. Fu, Q. Xu, J. Low, C. Jiang and J. Yu, *Appl. Catal. B: Environ.*, 2019, **243**, 556-565.
3. S. Adhikari, S. Mandal and Do-H. Kim, *Chem. Eng. J.*, 2019, **337**, 31-43
4. L. Li, C-G. Niu, H. Guo, J. Wang, M. Ruan, L. Zhang, C. Liang, H-Y. Liu and Y-Y. Yang, *Chem. Eng. J.*, 2020, **383**, 123192.
5. X-J. Wen, C-G. Niu, H. Guo, L. Zhang, C. Liang and G-M. Zeng, *J. Catal.*, 2018, **385**, 211-223.
6. A. Kaur and S. K. Kansal, *Chem. Eng. J.*, 2016, **302**, 194-203.
7. A. Kumar, A. Rana, G. Sharma, M. Naushad, A. H. Al-Muhtaseb, C. Guo, A. I. Juez and F. J. Stadler, *ACS Appl. Mater. Interfaces*, 2018, **10**, 40474-40490.

8. Y. Jiang , X. Jing, K. Zhu, Z. Peng, J. Zhang, Y. Liu, W. Zhang, L. Ni and Z. Liu, Dalton Trans., 2018, **47**, 13113-13125.
9. J. Zhou, W. Liu and W, Cai, Sci. Total Environ., 2019, 696, 133962.
10. L. Zeng, S. Li, X. Li, J. Li, S. Fan, X. Chen, Z. Yin, M. Tadé and S. Liu, Chem. Eng. J., 2019, 378, 122039.
11. A. Wang, Z. Chen, Z. Zheng, H. Xu, H. Wang, K. Hu and K. Yan, Chem. Eng. J.,2020, 379, 122340.
12. S. G.Fard, M.Haghighi and M.Shabani, Appl. Catal. B: Environ., 2019, 248, 320-331.
